# Supplementary material
Source: PubMed Central journal article supplement (PMC2882697)

**Figure S1**

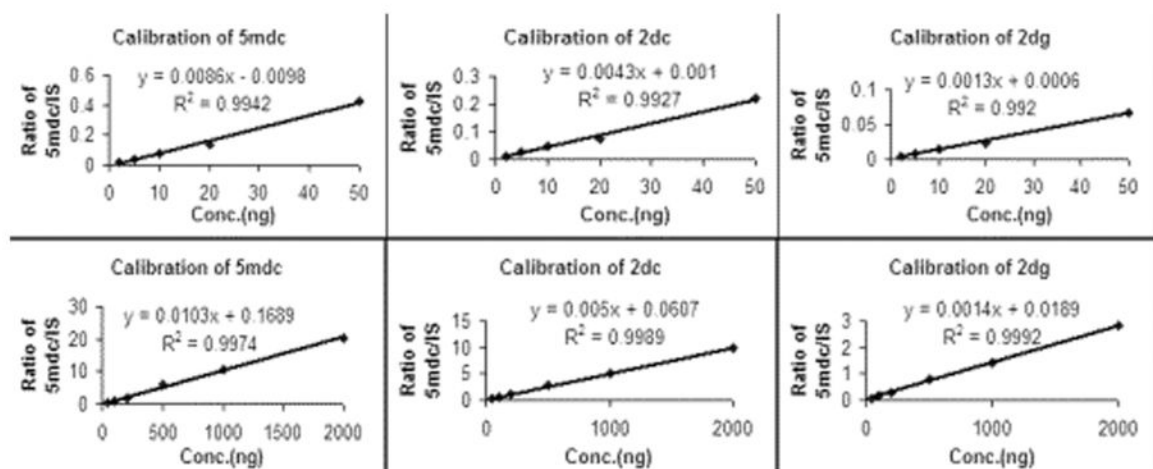

**Figure S2**

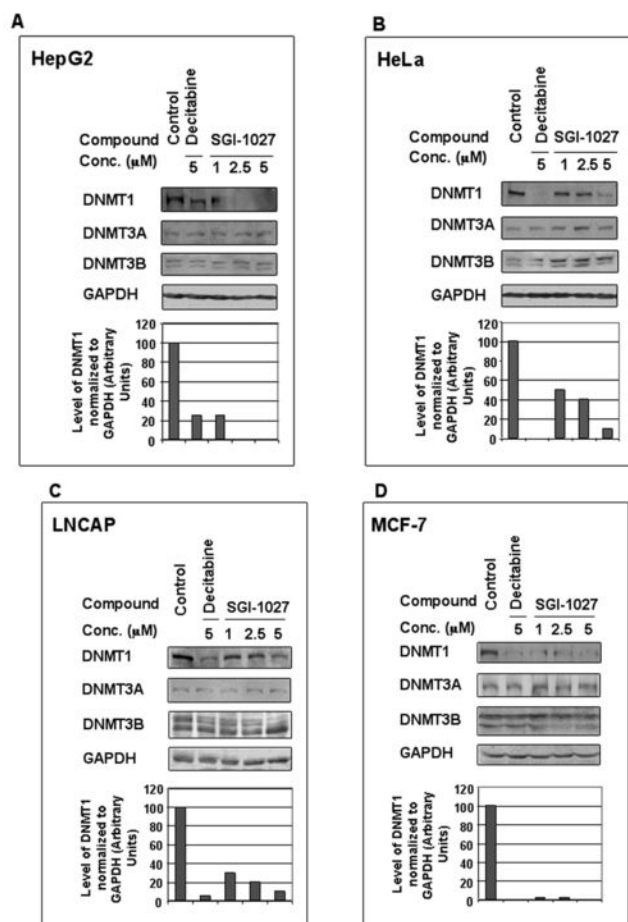

Supplement: NIHMS153069-supplement-Figure.pdf [file NIHMS153069-supplement-Figure.pdf]
